# Supplementary material for: Ultralow loading palladium nanocatalysts prepared by atomic layer deposition on three-dimensional graphite-coated nickel foam to enhance the ethanol electro-oxidation reaction
Source: Royal Society of Chemistry journal article supplement (doi:10.1039/c5ra24546j), 2016-01-01
Supplement: c5ra24546j1.pdf [file c5ra24546j1.pdf]

## Electronic Supporting Information

### Ultralow loading palladium nanocatalysts prepared by atomic layer deposition on three-dimensional graphite-coated nickel foam to enhanced ethanol electro-oxidation reaction

Yiwu Jiang, Jinwei Chen\*, Jie Zhang, Anqi Li, Yaping Zeng, Feilong Zhou, Gang Wang, Ruilin Wang\*

College of Materials Science and Engineering, Sichuan University, Chengdu 610065,  
China

\* Corresponding author. Tel & Fax: +86 28 85418018.

E-mail address: [jwchen@scu.edu.cn](mailto:jwchen@scu.edu.cn), [rl.wang@scu.edu.cn](mailto:rl.wang@scu.edu.cn)

Table S1 Comparing to the catalytic activity of as-prepared catalysts

| catalysts     | ECSA (m <sup>2</sup> /g) | Peaking current density (mA/cm <sup>2</sup> ) |
|---------------|--------------------------|-----------------------------------------------|
| ALD-Pd/GNF-5  | 17.72                    | 6.2                                           |
| ALD-Pd/GNF-10 | 63.88                    | 16.9                                          |
| ALD-Pd/GNF-15 | 14.70                    | 4.2                                           |

Table S2 Fitting results of EIS.

| catalysts     | R <sub>s</sub> (Ω) | CPE (Y/s <sup>n</sup> ) | R <sub>CT</sub> (Ω) |
|---------------|--------------------|-------------------------|---------------------|
| ALD-Pd/GNF-5  | 3.82               | 1.52×10 <sup>-4</sup>   | 494.1               |
| ALD-Pd/GNF-10 | 2.41               | 2.10×10 <sup>-4</sup>   | 246.6               |
| ALD-Pd/GNF-15 | 2.81               | 1.40×10 <sup>-4</sup>   | 308.7               |

Table S3 Comparing the experimental conditions, certain morphologies, catalytic activity, etc. with this work and previous work on Pd, PdNi catalysts reported in recent literatures.

| Sample   | Experimental conditions      | Certain morphologies | Surface compositions | Peak current (mA/mg <sub>Pd</sub> ) | Stability                             | Reference |
|----------|------------------------------|----------------------|----------------------|-------------------------------------|---------------------------------------|-----------|
| Pd/h-ppy | Solvothermal reaction        | Nanoparticles        | Pd                   | 700                                 | 28 % activity retention after 6000 s. | 1         |
| PdNCs/G  | Wet chemical method          | Nanocubes            | Pd                   | 429.8                               | 16 % activity retention after 700 s.  | 2         |
| Pd/TNTs  | Atomic Layer Deposition      | Nanoparticles        | Pd, PdO <sub>x</sub> | 2250                                | 12 % activity retention after 3600s.  | 3         |
| Pd/rGO   | Electro-chemically deposited | Nanorod              | Pd, PdO <sub>x</sub> | 725                                 | 27 % activity retention after 3600s.  | 4         |

|                      |                                        |                                      |                            |        |                                                             |    |
|----------------------|----------------------------------------|--------------------------------------|----------------------------|--------|-------------------------------------------------------------|----|
|                      |                                        |                                      |                            |        | 74.9 %                                                      |    |
| Pd/GA/<br>NF         | Self-assembly<br>aggregation<br>method | Nanoparticles                        | Pd,<br>PdO <sub>x</sub>    | 874    | activity<br>retention<br>after 1030 <sup>th</sup><br>cycle. | 5  |
| Pd/<br>PDIL-<br>NGS  | Wet<br>chemical<br>method              | Nanoparticles                        | Pd                         | 1229.9 | 43 %<br>activity<br>retention<br>after 7200s.               | 6  |
| Pd-<br>Ni/C          | microwave-<br>irradiation              | Nanoparticles                        | Pd, Ni                     | 770.7  | 47 %<br>activity<br>retention<br>after 4800s.               | 7  |
| PdNi-<br>NNs/<br>RGO | Wet<br>chemical<br>method              | Nanowire<br>-network                 | Ni, Pd<br>PdO <sub>x</sub> | 604    | Dropped to<br>approximate<br>zero after<br>2000s.           | 8  |
| PdNi                 | Wet<br>chemical<br>method              | Irregular<br>porous<br>nanoparticles | Ni, Pd<br>PdO <sub>x</sub> | 1110   | 52 %<br>activity<br>retention<br>after 1000s.               | 9  |
| Pd/                  | Wet                                    | Nanoparticles                        | Pd                         | 2939   | 59 %                                                        | 10 |

|      |                |               |    |      |                         |      |
|------|----------------|---------------|----|------|-------------------------|------|
| CNTs | chemical       |               |    |      | activity                |      |
|      | method         |               |    |      | retention               |      |
|      |                |               |    |      | after 500 <sup>th</sup> |      |
|      |                |               |    |      | cycle.                  |      |
|      |                |               |    |      | 38 %                    |      |
| Pd/  | self-assembled |               |    |      | activity                |      |
| CNTs | and heat-      | Nanoparticles | Pd | 2858 | retention               | 11   |
|      | treatment      |               |    |      | after 1000s.            |      |
|      |                |               |    |      | 4.1 %                   |      |
| ALD- | Atomic         |               |    |      | activity                | This |
| Pd/  | Layer          | Nanoparticles | Pd | 920  | retention               | work |
| GNF  | Deposition     |               |    |      | after 4000s.            |      |

## References

1. Z. Bai, Q. Zhang, J. Lv, S. Chao, L. Yang and J. Qiao, *Electrochimica Acta*, 2015, **177**, 107-112.
2. Y. Zhang, Q. Huang, G. Chang, Z. Zhang, T. Xia, H. Shu and Y. He, *Journal of Power Sources*, 2015, **280**, 422-429.
3. L. Assaud, N. Brazeau, M. K. S. Barr, M. Hanbücken, S. Ntais, E. A. Baranova and L. Santinacci, *ACS Applied Materials & Interfaces*, 2015, **7**, 24533-24542.
4. M. Sawangphruk, A. Krittayavathananon and N. Chinwipas, *J. Mater. Chem. A*, 2013, **1**, 1030-1034.
5. a. K. N. H. Chi-Him A. Tsang, K. S. Hui, L. Rend, *J. Mater. Chem. A*, 2014, **2**, 17986-17993.
6. S. Li, H. Yang, R. Ren, J. Ma, J. Jin and J. Ma, *Journal of Power Sources*, 2015, **294**, 360-368.

7. R. S. Amin, R. M. A. Hameed and K. M. El-Khatib, *Applied Catalysis B: Environmental*, 2014, **148-149**, 557-567.
8. B. Y. Duan Bin, Fangfang Ren, Ke Zhang, Ping Yang, Yukou Du, *J. Mater. Chem. A*, 2015, **3**, 14001–14006.
9. C. Zhu, D. Wen, M. Oschatz, M. Holzschuh, W. Liu, A.-K. Herrmann, F. Simon, S. Kaskel and A. Eychmüller, *Small*, 2015, **11**, 1430-1434.
10. M. S. Ahmed and S. Jeon, *Journal of Power Sources*, 2015, **282**, 479-488.
11. Y. C. Jin Zhang, Shanfu Lu, Lichao Jia, Pei Kang Shenc, San Ping Jian, *Chem. Commun.*, 2014, **50**, 13732--13734.
